# Supplementary material for: A molybdenum complex bearing PNP-type pincer ligands leads to the catalytic reduction of dinitrogen into ammonia
Source: Springer Nature journal article supplement (doi:10.1038/nchem.906), 2010-12-05
Supplement: 41557_2011_BFnchem906_MOESM2_ESM.mol [file 41557_2011_BFnchem906_MOESM2_ESM.mol]

  ChemDraw11181012282D

 30 26  0  0  0  0  0  0  0  0999 V2000
   -0.9527    0.7628    0.0000 C   0  0  0  0  0  0  0  0  0  0  0  0
   -1.7775    0.7786    0.0000 C   0  0  0  0  0  0  0  0  0  0  0  0
   -2.2036    0.0721    0.0000 C   0  0  0  0  0  0  0  0  0  0  0  0
   -1.8049   -0.6501    0.0000 C   0  0  0  0  0  0  0  0  0  0  0  0
   -0.9800   -0.6659    0.0000 C   0  0  0  0  0  0  0  0  0  0  0  0
   -0.5539    0.0406    0.0000 N   0  0  0  0  0  0  0  0  0  0  0  0
   -0.5281    1.4668    0.0000 C   0  0  0  0  0  0  0  0  0  0  0  0
    0.2939    1.4511    0.0000 P   0  0  0  0  0  0  0  0  0  0  0  0
   -0.5826   -1.3856    0.0000 C   0  0  0  0  0  0  0  0  0  0  0  0
    0.2424   -1.3856    0.0000 P   0  0  0  0  0  0  0  0  0  0  0  0
   -0.1701   -2.1001    0.0000 C   0  0  0  0  0  0  0  0  0  0  0  0
    0.8257   -1.9690    0.0000 C   0  0  0  0  0  0  0  0  0  0  0  0
   -0.1186    2.1655    0.0000 C   0  0  0  0  0  0  0  0  0  0  0  0
    0.8773    2.0344    0.0000 C   0  0  0  0  0  0  0  0  0  0  0  0
   -0.9155    1.9520    0.0000 C   0  0  0  0  0  0  0  0  0  0  0  0
    0.1960    2.9251    0.0000 C   0  0  0  0  0  0  0  0  0  0  0  0
   -0.7020    2.7489    0.0000 C   0  0  0  0  0  0  0  0  0  0  0  0
    1.6714    1.8216    0.0000 C   0  0  0  0  0  0  0  0  0  0  0  0
    0.6645    2.8285    0.0000 C   0  0  0  0  0  0  0  0  0  0  0  0
    1.4586    2.6158    0.0000 C   0  0  0  0  0  0  0  0  0  0  0  0
    0.2409   -2.8121    0.0000 C   0  0  0  0  0  0  0  0  0  0  0  0
   -0.9923   -2.1001    0.0000 C   0  0  0  0  0  0  0  0  0  0  0  0
   -0.1701   -2.9251    0.0000 C   0  0  0  0  0  0  0  0  0  0  0  0
    0.8257   -2.7940    0.0000 C   0  0  0  0  0  0  0  0  0  0  0  0
    1.5853   -1.6544    0.0000 C   0  0  0  0  0  0  0  0  0  0  0  0
    1.4091   -2.5523    0.0000 C   0  0  0  0  0  0  0  0  0  0  0  0
    0.7391    0.2468    0.0000 Mo  0  1  0  0  0  0  0  0  0  0  0  0
    0.8430    1.1979    0.0000 Cl  0  5  0  0  0  0  0  0  0  0  0  0
    2.2036    0.2311    0.0000 Cl  0  5  0  0  0  0  0  0  0  0  0  0
    0.8788   -0.9935    0.0000 Cl  0  5  0  0  0  0  0  0  0  0  0  0
  1  2  2  0      
  2  3  1  0      
  3  4  2  0      
  4  5  1  0      
  5  6  2  0      
  6  1  1  0      
  1  7  1  0      
  7  8  1  0      
  5  9  1  0      
  9 10  1  0      
 10 11  1  0      
 10 12  1  0      
  8 13  1  0      
  8 14  1  0      
 13 15  1  0      
 13 16  1  0      
 13 17  1  0      
 14 18  1  0      
 14 19  1  0      
 14 20  1  0      
 11 21  1  0      
 11 22  1  0      
 11 23  1  0      
 12 24  1  0      
 12 25  1  0      
 12 26  1  0      
M  CHG  4  27   3  28  -1  29  -1  30  -1
M  END
