# Supplementary material for: A molybdenum complex bearing PNP-type pincer ligands leads to the catalytic reduction of dinitrogen into ammonia
Source: Springer Nature journal article supplement (doi:10.1038/nchem.906), 2010-12-05
Supplement: 41557_2011_BFnchem906_MOESM8_ESM.mol [file 41557_2011_BFnchem906_MOESM8_ESM.mol]

  ChemDraw11301006442D

 64 57  0  0  0  0  0  0  0  0999 V2000
   -5.0906    0.7183    0.0000 C   0  0  0  0  0  0  0  0  0  0  0  0
   -5.9155    0.7341    0.0000 C   0  0  0  0  0  0  0  0  0  0  0  0
   -6.3416    0.0276    0.0000 C   0  0  0  0  0  0  0  0  0  0  0  0
   -5.9428   -0.6946    0.0000 C   0  0  0  0  0  0  0  0  0  0  0  0
   -5.1179   -0.7104    0.0000 C   0  0  0  0  0  0  0  0  0  0  0  0
   -4.6919   -0.0039    0.0000 N   0  0  0  0  0  0  0  0  0  0  0  0
   -4.6660    1.4223    0.0000 C   0  0  0  0  0  0  0  0  0  0  0  0
   -3.8440    1.4066    0.0000 P   0  0  0  0  0  0  0  0  0  0  0  0
   -4.7206   -1.4301    0.0000 C   0  0  0  0  0  0  0  0  0  0  0  0
   -3.8956   -1.4301    0.0000 P   0  0  0  0  0  0  0  0  0  0  0  0
   -4.3081   -2.1446    0.0000 C   0  0  0  0  0  0  0  0  0  0  0  0
   -3.3122   -2.0135    0.0000 C   0  0  0  0  0  0  0  0  0  0  0  0
   -4.2565    2.1211    0.0000 C   0  0  0  0  0  0  0  0  0  0  0  0
   -3.2607    1.9899    0.0000 C   0  0  0  0  0  0  0  0  0  0  0  0
   -5.0534    1.9075    0.0000 C   0  0  0  0  0  0  0  0  0  0  0  0
   -3.9419    2.8806    0.0000 C   0  0  0  0  0  0  0  0  0  0  0  0
   -4.8399    2.7044    0.0000 C   0  0  0  0  0  0  0  0  0  0  0  0
   -2.4665    1.7772    0.0000 C   0  0  0  0  0  0  0  0  0  0  0  0
   -3.4734    2.7841    0.0000 C   0  0  0  0  0  0  0  0  0  0  0  0
   -2.6793    2.5713    0.0000 C   0  0  0  0  0  0  0  0  0  0  0  0
   -3.8970   -2.8566    0.0000 C   0  0  0  0  0  0  0  0  0  0  0  0
   -5.1302   -2.1446    0.0000 C   0  0  0  0  0  0  0  0  0  0  0  0
   -4.3081   -2.9696    0.0000 C   0  0  0  0  0  0  0  0  0  0  0  0
   -3.3122   -2.8385    0.0000 C   0  0  0  0  0  0  0  0  0  0  0  0
   -2.5527   -1.6988    0.0000 C   0  0  0  0  0  0  0  0  0  0  0  0
   -2.7288   -2.5968    0.0000 C   0  0  0  0  0  0  0  0  0  0  0  0
   -3.3702    0.0591    0.0000 Mo  0  0  0  0  0  0  0  0  0  0  0  0
   -1.0977    0.1522    0.0000 N   0  0  0  0  0  0  0  0  0  0  0  0
   -0.2727    0.1522    0.0000 N   0  0  0  0  0  0  0  0  0  0  0  0
   -1.8711   -1.6239    0.0000 C   0  5  0  0  0  0  0  0  0  0  0  0
   -1.8711   -2.4489    0.0000 O   0  3  0  0  0  0  0  0  0  0  0  0
   -1.8711    2.7017    0.0000 O   0  3  0  0  0  0  0  0  0  0  0  0
   -1.8711    1.8767    0.0000 C   0  5  0  0  0  0  0  0  0  0  0  0
    1.8027    2.5226    0.0000 O   0  3  0  0  0  0  0  0  0  0  0  0
    1.8027    1.6976    0.0000 C   0  5  0  0  0  0  0  0  0  0  0  0
    1.5163   -1.6883    0.0000 C   0  5  0  0  0  0  0  0  0  0  0  0
    1.5163   -2.5133    0.0000 O   0  3  0  0  0  0  0  0  0  0  0  0
    5.1014   -0.7058    0.0000 C   0  0  0  0  0  0  0  0  0  0  0  0
    5.9264   -0.7089    0.0000 C   0  0  0  0  0  0  0  0  0  0  0  0
    6.3416    0.0041    0.0000 C   0  0  0  0  0  0  0  0  0  0  0  0
    5.9317    0.7201    0.0000 C   0  0  0  0  0  0  0  0  0  0  0  0
    5.1067    0.7231    0.0000 C   0  0  0  0  0  0  0  0  0  0  0  0
    4.6916    0.0102    0.0000 N   0  0  0  0  0  0  0  0  0  0  0  0
    4.6877   -1.4163    0.0000 C   0  0  0  0  0  0  0  0  0  0  0  0
    3.8656   -1.4132    0.0000 P   0  0  0  0  0  0  0  0  0  0  0  0
    4.6983    1.4366    0.0000 C   0  0  0  0  0  0  0  0  0  0  0  0
    3.8734    1.4239    0.0000 P   0  0  0  0  0  0  0  0  0  0  0  0
    4.2748    2.1447    0.0000 C   0  0  0  0  0  0  0  0  0  0  0  0
    3.2811    1.9982    0.0000 C   0  0  0  0  0  0  0  0  0  0  0  0
    4.2890   -2.1212    0.0000 C   0  0  0  0  0  0  0  0  0  0  0  0
    3.2913   -2.0055    0.0000 C   0  0  0  0  0  0  0  0  0  0  0  0
    5.0825   -1.8955    0.0000 C   0  0  0  0  0  0  0  0  0  0  0  0
    3.9862   -2.8856    0.0000 C   0  0  0  0  0  0  0  0  0  0  0  0
    4.8813   -2.6955    0.0000 C   0  0  0  0  0  0  0  0  0  0  0  0
    2.4940   -1.8050    0.0000 C   0  0  0  0  0  0  0  0  0  0  0  0
    3.5163   -2.7963    0.0000 C   0  0  0  0  0  0  0  0  0  0  0  0
    2.7190   -2.5957    0.0000 C   0  0  0  0  0  0  0  0  0  0  0  0
    3.8528    2.8502    0.0000 C   0  0  0  0  0  0  0  0  0  0  0  0
    5.0969    2.1573    0.0000 C   0  0  0  0  0  0  0  0  0  0  0  0
    4.2621    2.9696    0.0000 C   0  0  0  0  0  0  0  0  0  0  0  0
    3.2684    2.8231    0.0000 C   0  0  0  0  0  0  0  0  0  0  0  0
    2.5265    1.6719    0.0000 C   0  0  0  0  0  0  0  0  0  0  0  0
    2.6888    2.5725    0.0000 C   0  0  0  0  0  0  0  0  0  0  0  0
    1.7966    0.0877    0.0000 Mo  0  0  0  0  0  0  0  0  0  0  0  0
  1  2  2  0      
  2  3  1  0      
  3  4  2  0      
  4  5  1  0      
  5  6  2  0      
  6  1  1  0      
  1  7  1  0      
  7  8  1  0      
  5  9  1  0      
  9 10  1  0      
 10 11  1  0      
 10 12  1  0      
  8 13  1  0      
  8 14  1  0      
 13 15  1  0      
 13 16  1  0      
 13 17  1  0      
 14 18  1  0      
 14 19  1  0      
 14 20  1  0      
 11 21  1  0      
 11 22  1  0      
 11 23  1  0      
 12 24  1  0      
 12 25  1  0      
 12 26  1  0      
 28 29  3  0      
 30 31  3  0      
 32 33  3  0      
 34 35  3  0      
 36 37  3  0      
 38 39  2  0      
 39 40  1  0      
 40 41  2  0      
 41 42  1  0      
 42 43  2  0      
 43 38  1  0      
 38 44  1  0      
 44 45  1  0      
 42 46  1  0      
 46 47  1  0      
 47 48  1  0      
 47 49  1  0      
 45 50  1  0      
 45 51  1  0      
 50 52  1  0      
 50 53  1  0      
 50 54  1  0      
 51 55  1  0      
 51 56  1  0      
 51 57  1  0      
 48 58  1  0      
 48 59  1  0      
 48 60  1  0      
 49 61  1  0      
 49 62  1  0      
 49 63  1  0      
M  CHG  8  30  -1  31   1  32   1  33  -1  34   1  35  -1  36  -1  37   1
M  END
