# Supplementary material for: A molybdenum complex bearing PNP-type pincer ligands leads to the catalytic reduction of dinitrogen into ammonia
Source: Springer Nature journal article supplement (doi:10.1038/nchem.906), 2010-12-05
Supplement: 41557_2011_BFnchem906_MOESM17_ESM.mol [file 41557_2011_BFnchem906_MOESM17_ESM.mol]

  ChemDraw11181012282D

 41 38  0  0  0  0  0  0  0  0999 V2000
   -3.4810    0.7628    0.0000 C   0  0  0  0  0  0  0  0  0  0  0  0
   -4.3059    0.7786    0.0000 C   0  0  0  0  0  0  0  0  0  0  0  0
   -4.7319    0.0721    0.0000 C   0  0  0  0  0  0  0  0  0  0  0  0
   -4.3332   -0.6501    0.0000 C   0  0  0  0  0  0  0  0  0  0  0  0
   -3.5083   -0.6659    0.0000 C   0  0  0  0  0  0  0  0  0  0  0  0
   -3.0822    0.0406    0.0000 N   0  0  0  0  0  0  0  0  0  0  0  0
   -3.0564    1.4668    0.0000 C   0  0  0  0  0  0  0  0  0  0  0  0
   -2.2344    1.4511    0.0000 P   0  0  0  0  0  0  0  0  0  0  0  0
   -3.1110   -1.3856    0.0000 C   0  0  0  0  0  0  0  0  0  0  0  0
   -2.2860   -1.3856    0.0000 P   0  0  0  0  0  0  0  0  0  0  0  0
   -2.6985   -2.1001    0.0000 C   0  0  0  0  0  0  0  0  0  0  0  0
   -1.7026   -1.9690    0.0000 C   0  0  0  0  0  0  0  0  0  0  0  0
   -2.6469    2.1655    0.0000 C   0  0  0  0  0  0  0  0  0  0  0  0
   -1.6510    2.0344    0.0000 C   0  0  0  0  0  0  0  0  0  0  0  0
   -3.4438    1.9520    0.0000 C   0  0  0  0  0  0  0  0  0  0  0  0
   -2.3323    2.9251    0.0000 C   0  0  0  0  0  0  0  0  0  0  0  0
   -3.2303    2.7489    0.0000 C   0  0  0  0  0  0  0  0  0  0  0  0
   -0.8569    1.8216    0.0000 C   0  0  0  0  0  0  0  0  0  0  0  0
   -1.8638    2.8285    0.0000 C   0  0  0  0  0  0  0  0  0  0  0  0
   -1.0697    2.6158    0.0000 C   0  0  0  0  0  0  0  0  0  0  0  0
   -2.2874   -2.8121    0.0000 C   0  0  0  0  0  0  0  0  0  0  0  0
   -3.5206   -2.1001    0.0000 C   0  0  0  0  0  0  0  0  0  0  0  0
   -2.6985   -2.9251    0.0000 C   0  0  0  0  0  0  0  0  0  0  0  0
   -1.7026   -2.7940    0.0000 C   0  0  0  0  0  0  0  0  0  0  0  0
   -0.9430   -1.6544    0.0000 C   0  0  0  0  0  0  0  0  0  0  0  0
   -1.1192   -2.5523    0.0000 C   0  0  0  0  0  0  0  0  0  0  0  0
   -0.0052    0.1793    0.0000 N   0  0  0  0  0  0  0  0  0  0  0  0
    0.4000   -0.5393    0.0000 C   0  0  0  0  0  0  0  0  0  0  0  0
    1.2250   -0.5476    0.0000 C   0  0  0  0  0  0  0  0  0  0  0  0
    1.6447    0.1626    0.0000 C   0  0  0  0  0  0  0  0  0  0  0  0
    1.2395    0.8812    0.0000 C   0  0  0  0  0  0  0  0  0  0  0  0
    0.4145    0.8896    0.0000 C   0  0  0  0  0  0  0  0  0  0  0  0
   -1.4109   -1.2643    0.0000 F   0  5  0  0  0  0  0  0  0  0  0  0
   -1.5028   -0.2974    0.0000 Mo  0  2  0  0  0  0  0  0  0  0  0  0
   -1.5076    0.5977    0.0000 N   0  0  0  0  0  0  0  0  0  0  0  0
   -1.5076    1.4227    0.0000 N   0  0  0  0  0  0  0  0  0  0  0  0
    4.0175    0.1107    0.0000 B   0  5  0  0  0  0  0  0  0  0  0  0
    4.0175   -0.7114    0.0000 F   0  0  0  0  0  0  0  0  0  0  0  0
    3.3055    0.5218    0.0000 F   0  0  0  0  0  0  0  0  0  0  0  0
    4.7295    0.5218    0.0000 F   0  0  0  0  0  0  0  0  0  0  0  0
    4.7319   -0.3018    0.0000 F   0  0  0  0  0  0  0  0  0  0  0  0
  1  2  2  0      
  2  3  1  0      
  3  4  2  0      
  4  5  1  0      
  5  6  2  0      
  6  1  1  0      
  1  7  1  0      
  7  8  1  0      
  5  9  1  0      
  9 10  1  0      
 10 11  1  0      
 10 12  1  0      
  8 13  1  0      
  8 14  1  0      
 13 15  1  0      
 13 16  1  0      
 13 17  1  0      
 14 18  1  0      
 14 19  1  0      
 14 20  1  0      
 11 21  1  0      
 11 22  1  0      
 11 23  1  0      
 12 24  1  0      
 12 25  1  0      
 12 26  1  0      
 27 28  2  0      
 28 29  1  0      
 29 30  2  0      
 30 31  1  0      
 31 32  2  0      
 32 27  1  0      
 35 36  1  0      
 35 34  2  0      
 37 38  1  0      
 37 39  1  0      
 37 40  1  0      
 37 41  1  0      
M  CHG  3  33  -1  34   2  37  -1
M  END
